# Supplementary material for: Astrocyte Unfolded Protein Response Induces a Specific Reactivity State that Causes Non-Cell-Autonomous Neuronal Degeneration
Source: PubMed Central journal article supplement (PMC7054837; doi:10.1016/j.neuron.2019.12.014), 2020-03-04
Supplement: mmc1.pdf [file mmc1.pdf]

**Neuron, Volume 105**

**Supplemental Information**

**Astrocyte Unfolded Protein Response Induces  
a Specific Reactivity State that Causes  
Non-Cell-Autonomous Neuronal Degeneration**

**Heather L. Smith, Oliver J. Freeman, Adrian J. Butcher, Staffan Holmqvist, Ibrahim Humoud, Tobias Schätzl, Daniel T. Hughes, Nicholas C. Verity, Dean P. Swinden, Joseph Hayes, Lis de Weerd, David H. Rowitch, Robin J.M. Franklin, and Giovanna R. Mallucci**

**Figure S1 (related to Figure 1)**

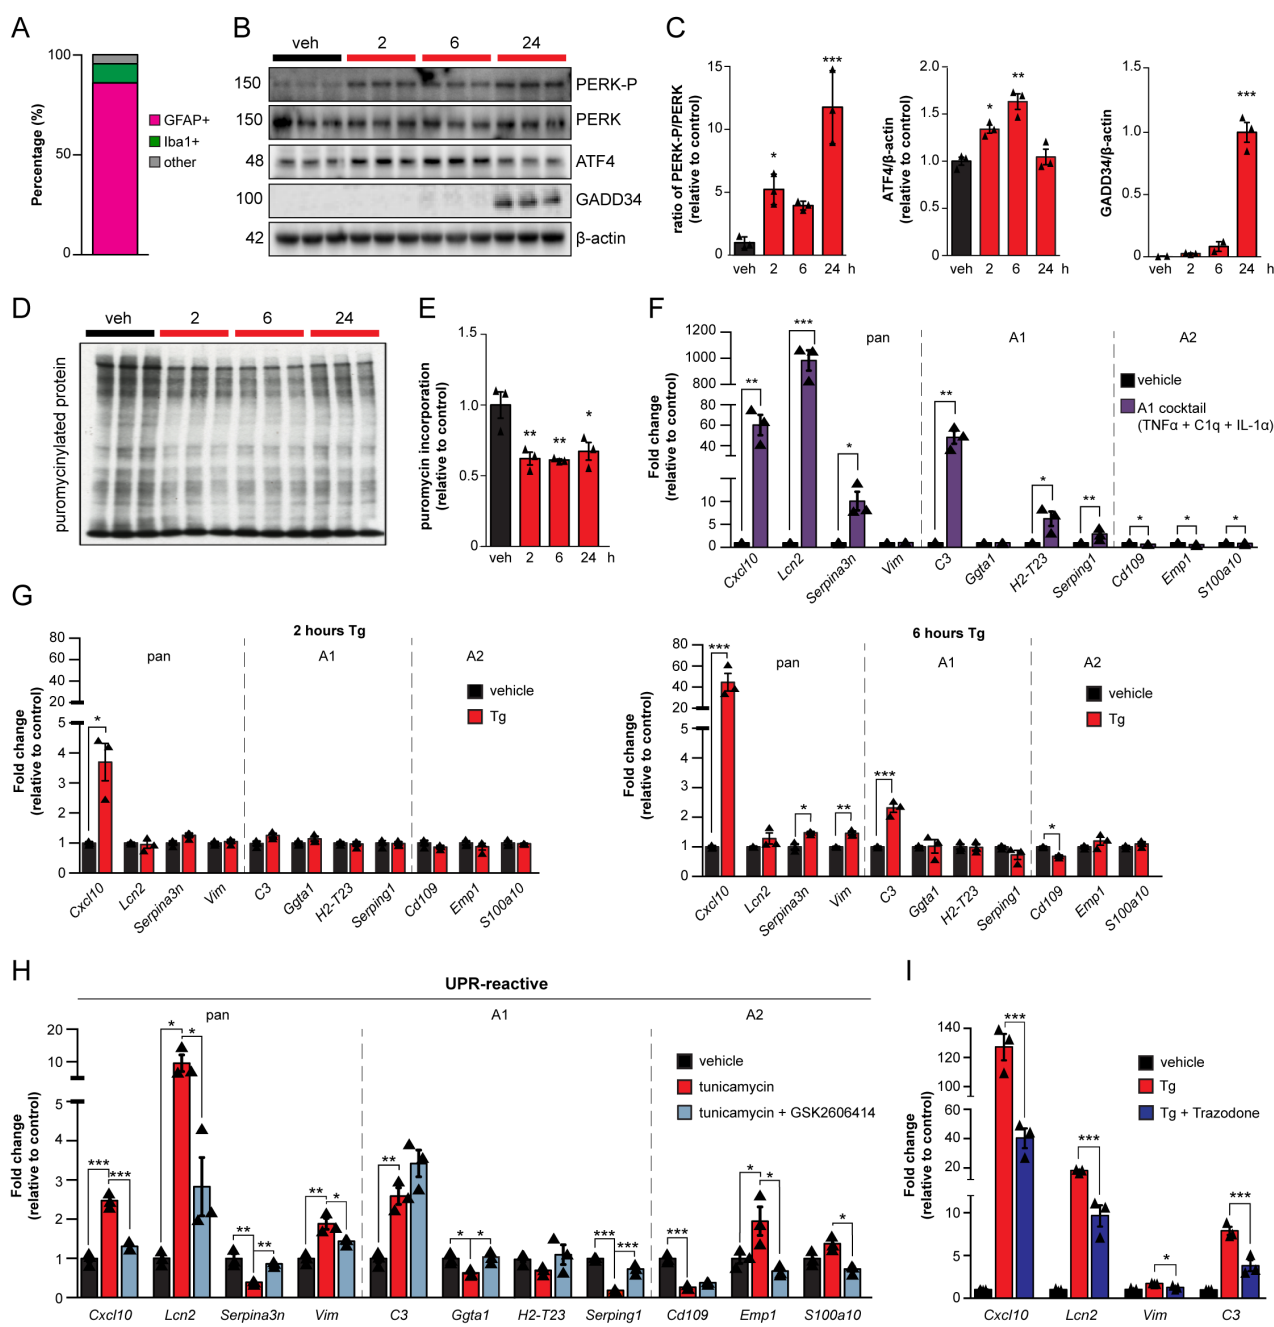

**Figure S1 (related to Figure 1). Thapsigargin and tunicamycin induce a reactive phenotype in primary cultured astrocytes.** (A) Purity of primary astrocyte cultures. Staining for the astrocyte-specific marker, GFAP and the microglial-specific marker, Iba1, revealed a purity of more than 80%. (B) Western blot analysis of PERK branch markers in primary astrocytes treated with 3  $\mu$ g/mL tunicamycin (Tm) for 2, 6 or 24 hours. Quantification of western blots shown in (C). (D) Protein synthesis rates were reduced following 2 hours of Tm treated, measured using puromycin incorporation into nascent proteins. Quantification of western blot shown in (E). (F) Positive control for the detection of a 'reactive' astrocyte profile by qPCR. Primary astrocytes were treated with the 'A1-cocktail' (TNF $\alpha$ , C1q and IL-1 $\alpha$ ) for 24 hours. 'Pan'- and 'A1'-reactive markers were significantly upregulated, whilst 'A2'-reactive markers were downregulated. (G) Reactivity profile of primary

astrocytes following 2 or 6 hours of Tg treatment. An altered reactivity state was observed from 6 hours onwards. (H) qPCR analysis of reactivity markers following 24 hours of Tm treatment. The PERK inhibitor, GSK2606414, largely restores the reactivity signature observed on ER stress. (I) Trazodone (20  $\mu$ M) partially restores the reactivity profile of Tg-stressed astrocytes, reducing the upregulation of *Cxcl10*, *Lcn2*, *Vim* and *C3*. All bar graphs show mean  $\pm$  SEM. \* $p$  <0.05, \*\* $p$  <0.01, \*\*\* $p$  <0.001, one-way ANOVA.  $n$  = 3 biological replicates.

**Figure S2 (related to Figure 1)**

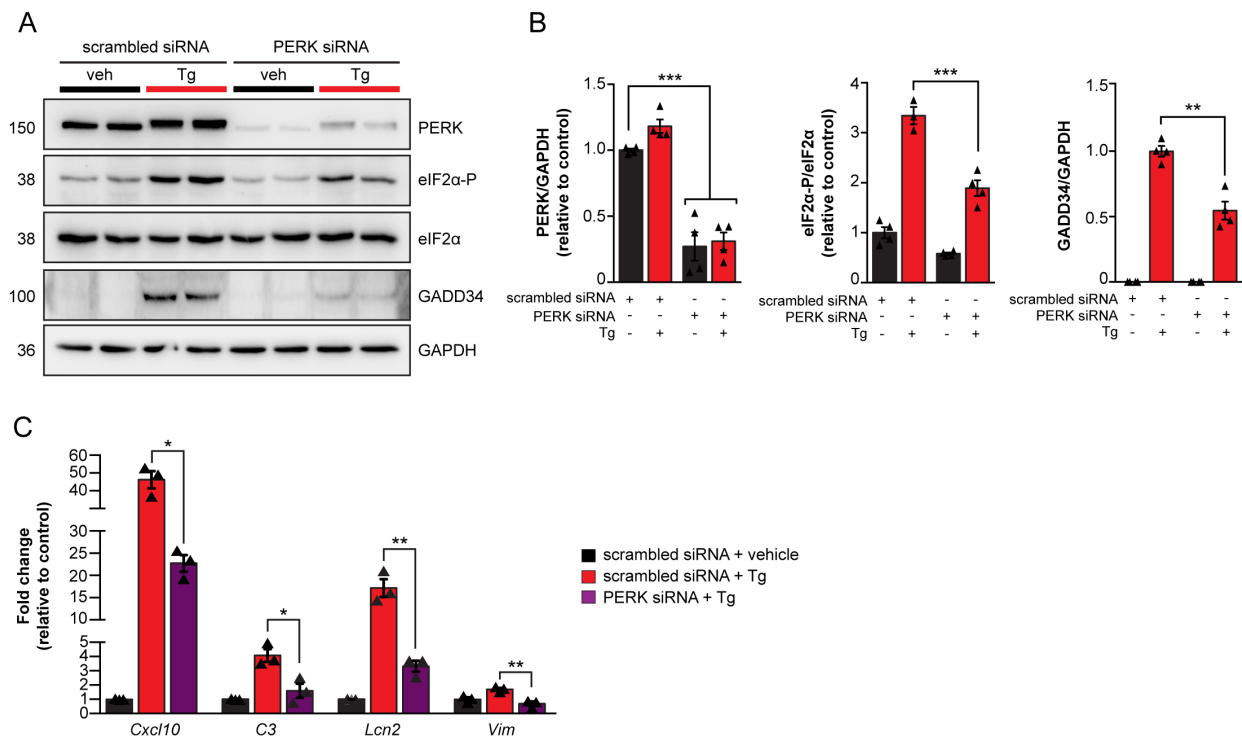

**Figure S2 (related to Figure 1). Genetic modulation of PERK-eIF2 $\alpha$  signalling reduces astrocyte reactivity on Tg treatment.** (A) The knockdown of PERK using siRNA significantly lowered the levels of eIF2 $\alpha$ -P and GADD34 on Tg treatment. Quantification of western blots shown in (B). (C) PERK knockdown significantly blunts the upregulation of *Cxcl10*, *C3*, *Lcn2* and *Vim* on Tg treatment. All bar graphs show mean  $\pm$  SEM. \* $p$  < 0.05, \*\* $p$  < 0.01, \*\*\* $p$  < 0.001, one-way ANOVA.  $n$  = 3 biological replicates.



**Figure S3 (related to Figure 3)**

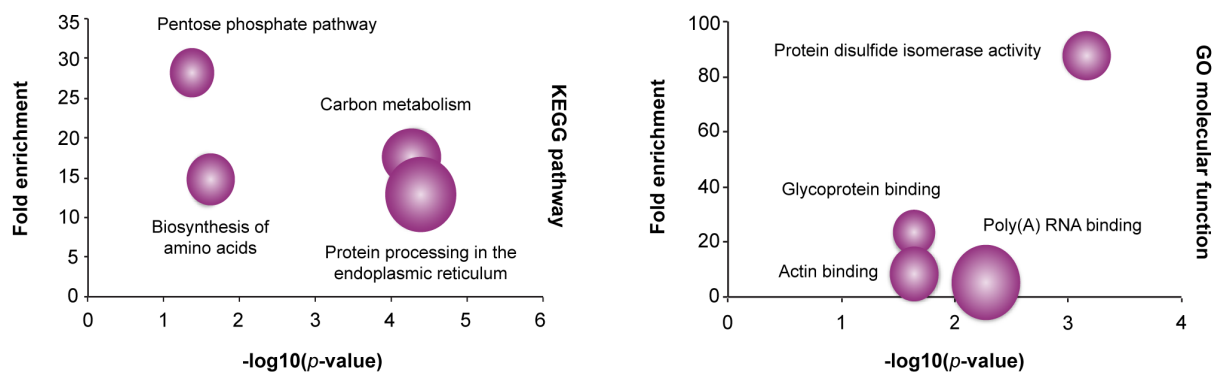

**Figure S3 (related to Figure 3). UPR-reactive astrocytes have an altered secretome.** Bubble plots showing KEGG and GO functional analysis of proteins that displayed increased spectral counts on Tg treatment, as determined using DAVID. 'Protein processing in the endoplasmic reticulum' and 'protein disulphide isomerase activity' were the most significantly enriched pathways, as determined by KEGG and GO Molecular Function, respectively ( $p\text{-value} < 0.0001$ ). Size of bubble represents protein count. LC/MS was performed on conditioned media from 3 biological replicates.

**Figure S4 (related to Figure 4)**

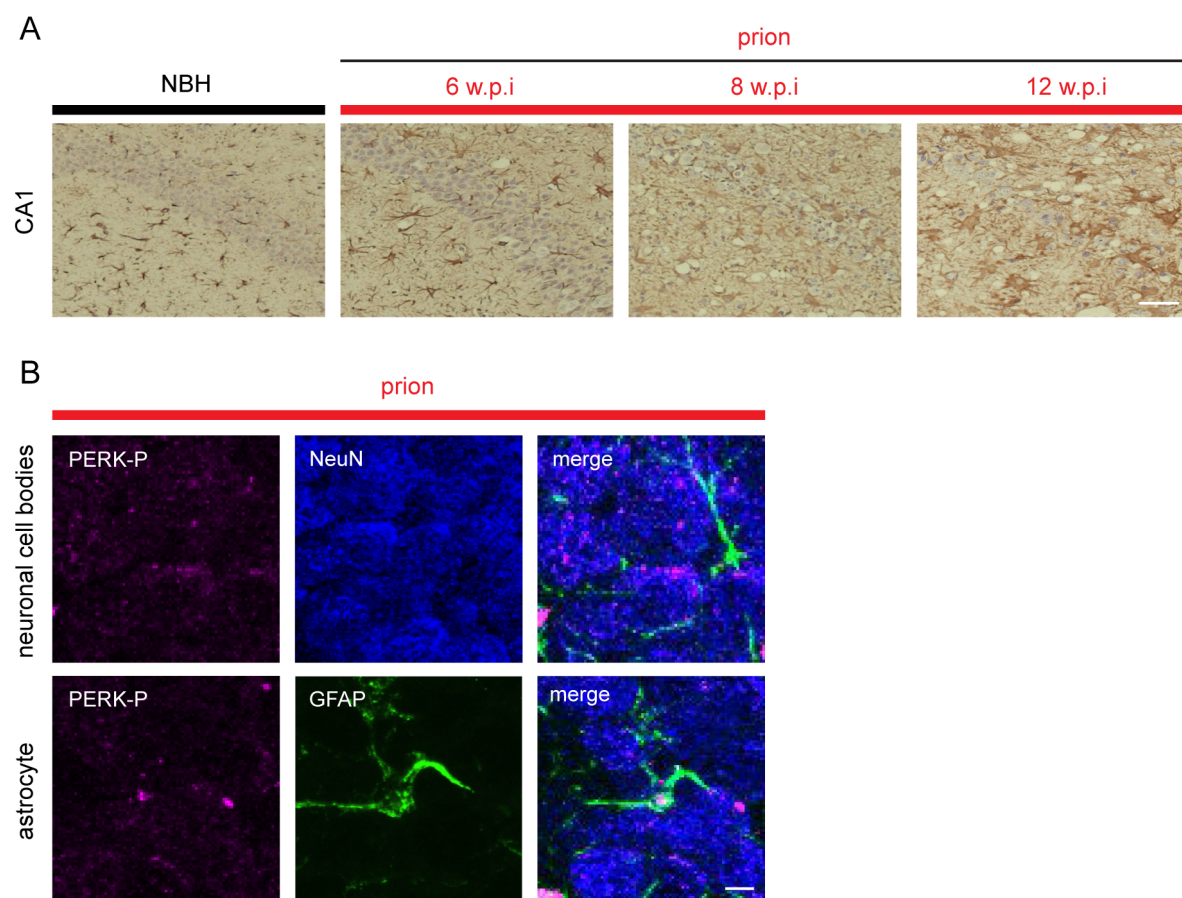

**Figure S4 (related to Figure 4). Prion-diseased mice show prominent astrocytosis from 8 w.p.i.** (A) Representative images of GFAP stained hippocampal sections from NBH and prion-diseased mice illustrating increased astrocytosis across the disease time course. Scale bar, 50  $\mu\text{m}$  (B) Hippocampal sections from prion-diseased mice at 10 w.p.i. showing PERK-P staining (magenta) in both the neuronal cell bodies (NeuN, blue) and astrocytes (GFAP, green). Scale bar, 10  $\mu\text{m}$ .

**Figure S5 (related to Figure 4)**

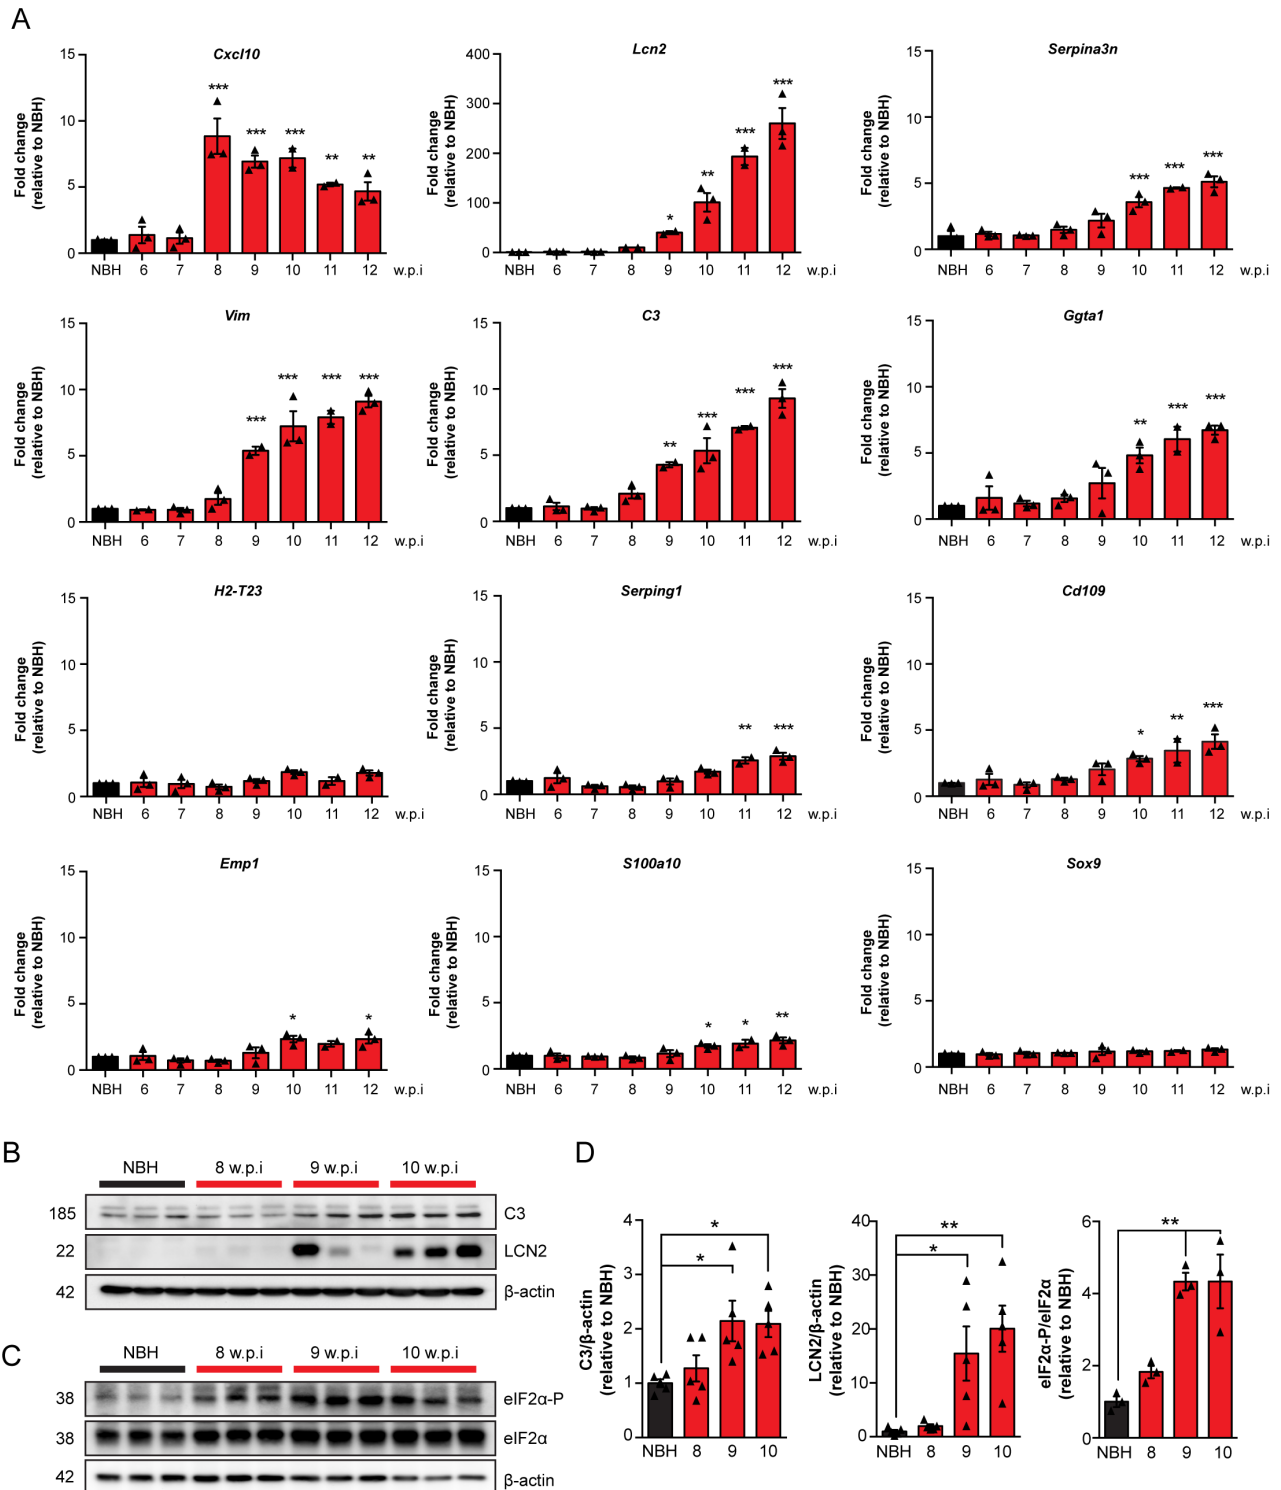

**Figure S5 (related to Figure 4). Astrocyte reactivity markers are elevated in prion-diseased mice. (A)** qPCR analysis of reactivity markers in hippocampal lysates from NBH and prion-inoculated mice. 9 out of the 11 markers show increased levels from 9 and 10 w.p.i. The upregulation of *Cxcl10* occurs slightly earlier, at 8 w.p.i. The mRNA levels of *Sox9*, a nuclear-specific marker that accounts for astrocyte number, remains unchanged through the course of the disease. Bar graphs show mean  $\pm$  SEM. \* $p < 0.05$ , \*\* $p < 0.01$ , \*\*\* $p < 0.001$ , one-way ANOVA.  $n = 3$  mice per time point. **(B)** Western blot analysis of C3 and LCN2 protein levels in hippocampal homogenates from NBH and prion-

diseased mice at 8, 9 and 10 w.p.i. **(C)** The increase in C3 and LCN2 protein at 9 w.p.i. correlates with increased PERK-eIF2 $\alpha$  signalling. Quantification of western blots shown in **(D)**. Bar graphs show mean  $\pm$  SEM. \* $p$  < 0.05, \*\* $p$  < 0.01, one-way ANOVA.  $n$  = 3-5 mice per time point.

**Figure S6 (related to Figures 5 and 6)**

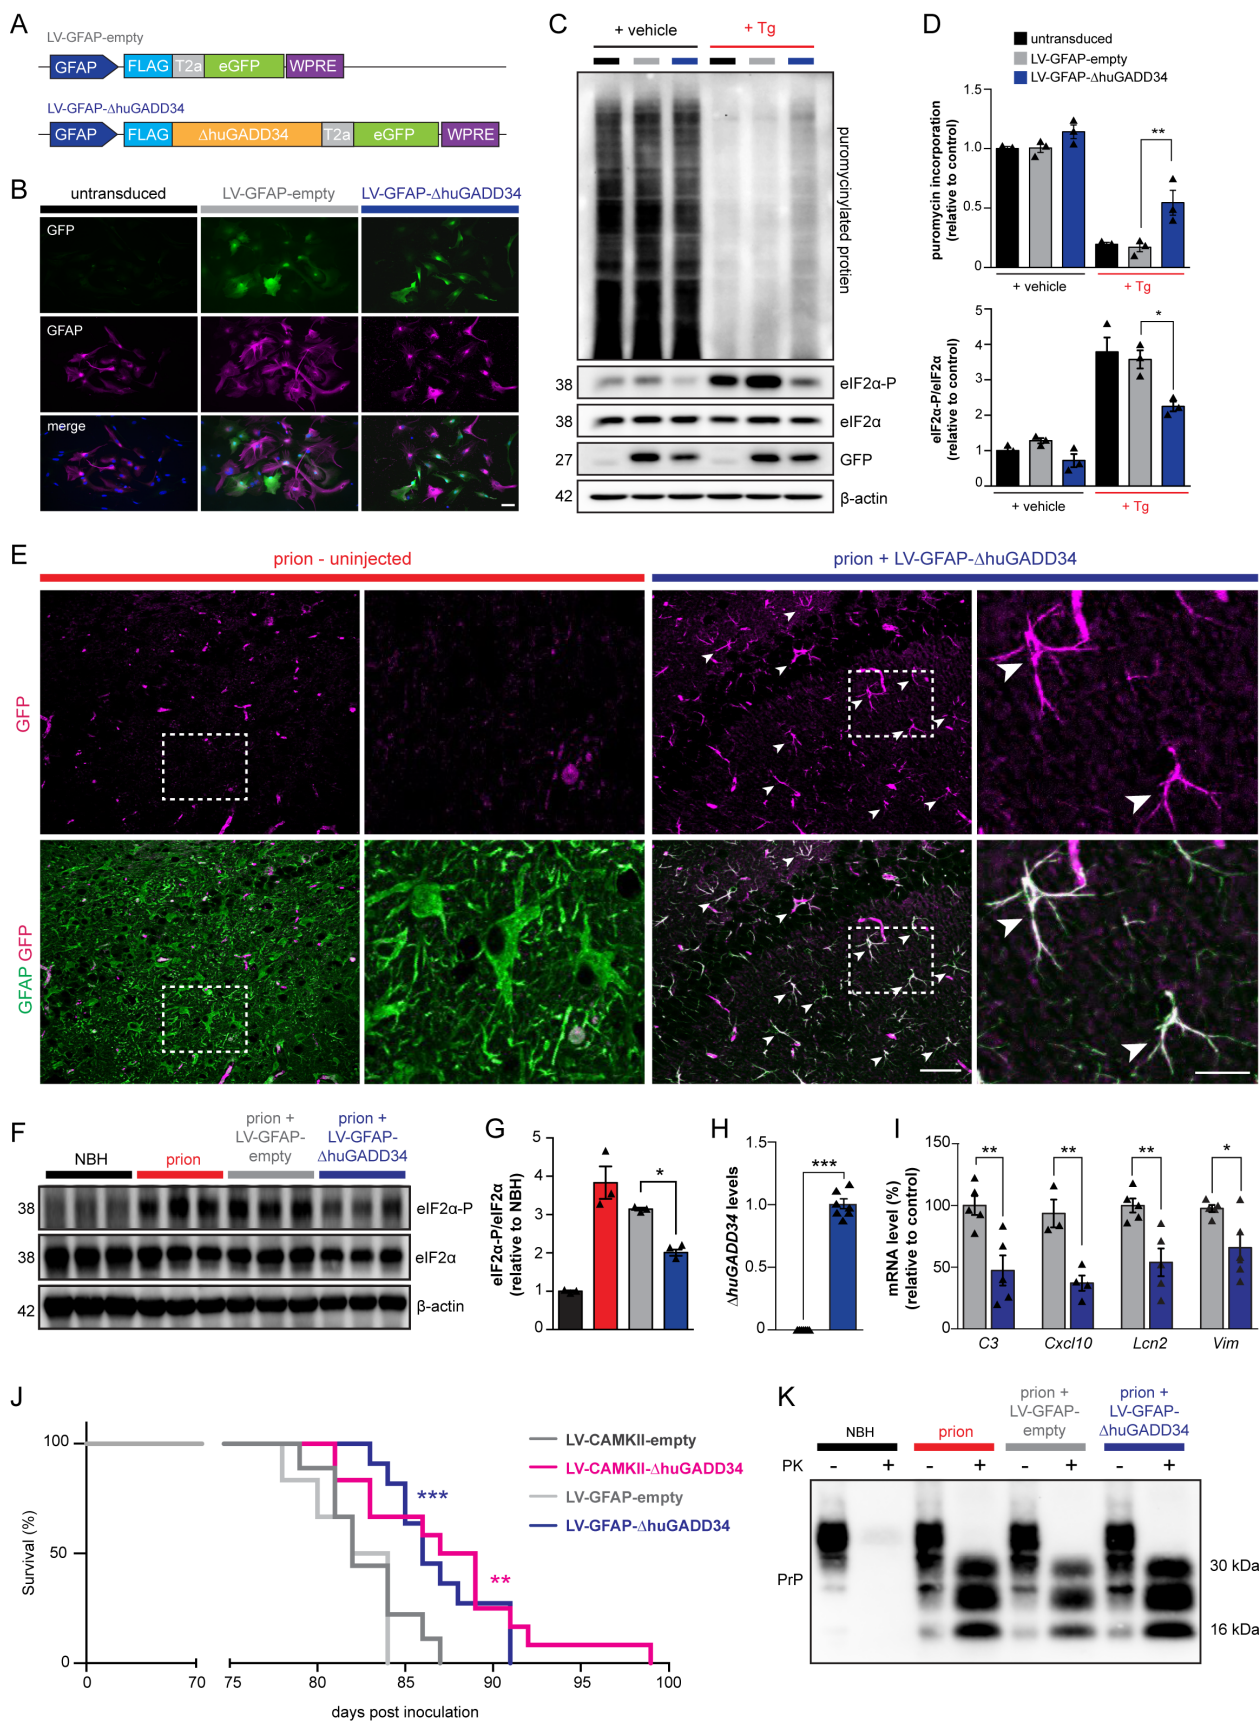

**Figure S6 (related to Figures 5 and 6). LV-GFAP- $\Delta$ huGADD34 reduces eIF2 $\alpha$ -P levels both *in vitro* and *in vivo*.** (A) Schematic showing the GFAP-empty and GFAP- $\Delta$ huGADD34 lentiviral constructs. (B) GFP staining in astrocytes transduced with either LV-GFAP-empty or LV-GFAP- $\Delta$ huGADD34 for 7 days. Scale bar, 50  $\mu$ m. (C) Primary astrocytes, transduced with LV-GFAP-empty or LV-GFAP- $\Delta$ huGADD34 for 7 days, were treated with 300 nM Tg for 2 hours. Astrocytes expressing  $\Delta$ huGADD34 showed increased protein synthesis rates and lower levels of eIF2 $\alpha$ -P on Tg treatment compared to astrocytes expressing GFP alone. Quantification shown in (D). Bar graphs show mean  $\pm$  SEM. \* $p$  < 0.05, \*\* $p$  < 0.01, one-way ANOVA.  $n$  = 3 biological replicates. (E) Representative images of GFP staining in the hippocampus of prion-inoculated mice injected with LV-GFAP- $\Delta$ huGADD34. GFP staining co-localised with GFAP<sup>+</sup> astrocytes. The over-expression of astrocytic  $\Delta$ huGADD34 substantially reduced the levels of astrocytosis compared to un-injected prion-inoculated mice. Scale bar, 50  $\mu$ m, zoomed panel, 20  $\mu$ m. (F) Western blot analysis of eIF2 $\alpha$ -P in NBH, prion, prion + LV-GFAP-empty and prion + LV-GFAP- $\Delta$ huGADD34 mice. The over-expression of  $\Delta$ huGADD34 significantly reduced the levels of eIF2 $\alpha$ -P, as quantified in (G). Bar graph shows mean  $\pm$  SEM. \* $p$  < 0.05, Student's t-test.  $n$  = 3 mice per condition. (H) Transcript levels of  $\Delta$ huGADD34 in prion-inoculated mice injected with either LV-GFAP-empty or LV-GFAP- $\Delta$ huGADD34.  $\Delta$ huGADD34 was only detected in LV-GFAP- $\Delta$ huGADD34-treated mice. \*\*\* $p$  < 0.001, Student's t-test.  $n$  = 5 mice per condition. (I) The astrocytic expression of  $\Delta$ huGADD34 significantly reduced the mRNA levels of the UPR-reactivity markers *C3*, *Cxcl10*, *Lcn2* and *Vim* at 10 w.p.i., as analysed by qPCR. \* $p$  < 0.05 \*\* $p$  < 0.01, Student's t-test.  $n$  = 5 mice per condition. (J) Neuronal or astrocytic modulation of PERK-eIF2 $\alpha$  both significantly prolonged survival. LV-CAMKII-empty = 9 mice, LV-CAMKII- $\Delta$ huGADD34 = 12 mice, LV-GFAP-empty = 6 mice, LV-GFAP- $\Delta$ huGADD34 = 11 mice. \*\* $p$  < 0.01, \*\*\* $p$  < 0.001, Mantel-Cox test. (K) Astrocytic  $\Delta$ huGADD34 does not affect the levels of total PrP or proteinase K-resistant PrP<sup>Sc</sup>.



Table S1 (related to Figure 3). Proteins identified in conditioned media from vehicle-, Tg- and Tg+GSK2606414-treated astrocytes.

| Identified Proteins                                                                                              | Accession Number         | Molecular Weight | Normalised spectral counts |      |          |                        |      |          |                        |      |          |         |      |          |
|------------------------------------------------------------------------------------------------------------------|--------------------------|------------------|----------------------------|------|----------|------------------------|------|----------|------------------------|------|----------|---------|------|----------|
|                                                                                                                  |                          |                  | Biological replicate 1     |      |          | Biological replicate 2 |      |          | Biological replicate 3 |      |          | Average |      |          |
|                                                                                                                  |                          |                  | vehicle                    | Tg   | Tg + GSK | vehicle                | Tg   | Tg + GSK | vehicle                | Tg   | Tg + GSK | vehicle | Tg   | Tg + GSK |
| 14-3-3 protein epsilon OS=Mus musculus OX=10090 GN=Ywhag PE=1 SV=1                                               | B433E_MOUSE              | 29 kDa           | 1.00                       | 1.63 | 4.88     | 1.00                   | 0.74 | 1.63     | 1.00                   | 0.67 | 0.81     | 1.00    | 1.01 | 2.44     |
| 14-3-3 protein eta OS=Mus musculus OX=10090 GN=Ywhag PE=1 SV=2                                                   | B433F_MOUSE              | 28 kDa           | 1.00                       | 1.25 | 5.00     | 1.00                   | 1.00 | 2.40     | 1.00                   | 0.75 | 0.58     | 1.00    | 1.00 | 2.66     |
| 14-3-3 protein gamma OS=Mus musculus OX=10090 GN=Ywhag PE=1 SV=2                                                 | B433G_MOUSE              | 28 kDa           | 1.00                       | 1.40 | 3.60     | 1.00                   | 1.00 | 1.83     | 1.00                   | 0.64 | 0.64     | 1.00    | 1.01 | 2.02     |
| 14-3-3 protein theta (Fragment) OS=Mus musculus OX=10090 GN=Ywhag PE=1 SV=1                                      | F6VW30_MOUSE (+3)        | 34 kDa           | 1.00                       | 1.50 | 6.00     | 1.00                   | 0.70 | 1.80     | 1.00                   | 0.75 | 0.69     | 1.00    | 0.98 | 2.83     |
| 14-3-3 protein zeta/delta OS=Mus musculus OX=10090 GN=Ywhag PE=1 SV=1                                            | B433Z_MOUSE              | 28 kDa           | 1.00                       | 1.50 | 3.38     | 1.00                   | 0.64 | 1.50     | 1.00                   | 0.79 | 0.58     | 1.00    | 0.98 | 1.82     |
| 6-phosphogluconate dehydrogenase, decarboxylating OS=Mus musculus OX=10090 GN=Pgd PE=1 SV=3                      | 4PPGD_MOUSE              | 53 kDa           | -                          | 3.00 | 12.00    | 1.00                   | 1.50 | 3.00     | 1.00                   | 1.67 | 1.67     | 1.00    | 2.06 | 5.56     |
| Alpha-2-macroglobulin-P OS=Mus musculus OX=10090 GN=A2m PE=2 SV=2                                                | A2MG_MOUSE               | 164 kDa          | 1.00                       | 0.16 | 0.47     | 1.00                   | 0.93 | 0.97     | 1.00                   | 0.61 | 0.61     | 1.00    | 0.57 | 0.69     |
| Alpha-enolase OS=Mus musculus OX=10090 GN=Eno1 PE=1 SV=3                                                         | ENOA_MOUSE               | 47 kDa           | 1.00                       | 1.57 | 3.86     | 1.00                   | 0.75 | 1.38     | 1.00                   | 0.95 | 0.77     | 1.00    | 1.09 | 2.00     |
| Amyloid-beta A4 protein OS=Mus musculus OX=10090 GN=App PE=1 SV=1                                                | AOA23BPT1_MOUSE (+3)     | 83 kDa           | 1.00                       | 1.00 | 1.00     | 1.00                   | 0.59 | 0.94     | 1.00                   | 0.83 | 1.33     | 1.00    | 0.81 | 1.09     |
| Annexin A2 OS=Mus musculus OX=10090 GN=Anxa2 PE=1 SV=2                                                           | ANXA2_MOUSE              | 39 kDa           | 1.00                       | 1.75 | 2.75     | 1.00                   | 1.00 | 1.15     | 1.00                   | 0.82 | 0.73     | 1.00    | 1.19 | 1.54     |
| Annexin A3 OS=Mus musculus OX=10090 GN=Anxa3 PE=1 SV=4                                                           | ANXA3_MOUSE              | 36 kDa           | 1.00                       | 3.00 | 6.50     | 1.00                   | 0.67 | 1.22     | 1.00                   | 0.94 | 0.69     | 1.00    | 1.53 | 2.80     |
| Annexin A5 OS=Mus musculus OX=10090 GN=Anxa5 PE=1 SV=1                                                           | ANXA5_MOUSE              | 36 kDa           | 1.00                       | 6.00 | 19.00    | 1.00                   | 0.67 | 1.17     | 1.00                   | 0.65 | 0.59     | 1.00    | 2.44 | 6.92     |
| Apolipoprotein E OS=Mus musculus OX=10090 GN=Apoe PE=1 SV=2                                                      | APOE_MOUSE               | 36 kDa           | 1.00                       | 1.00 | 3.25     | 1.00                   | 0.14 | 0.93     | 1.00                   | 0.53 | 0.53     | 1.00    | 0.56 | 1.57     |
| Arginine-rich, mutated in early stage tumors, isoform CRA_b OS=Mus musculus OX=10090 GN=Manf PE=1 SV=1           | Q3TMX5_MOUSE (+1)        | 20 kDa           | -                          | 5.00 | 2.00     | -                      | 3.00 | 3.00     | -                      | 3.00 | 1.00     | -       | 3.67 | 2.00     |
| Basement membrane-specific heparan sulfate proteoglycan core protein OS=Mus musculus OX=10090 GN=Hspg2 PE=1 SV=1 | B1B0C7_MOUSE (+1)        | 469 kDa          | 1.00                       | 0.12 | 0.94     | 1.00                   | 0.64 | 0.93     | 1.00                   | 0.74 | 0.74     | 1.00    | 0.50 | 0.87     |
| Beta-actin-like protein 2 OS=Mus musculus OX=10090 GN=Actbl2 PE=1 SV=1                                           | ACTBL_MOUSE              | 42 kDa           | 1.00                       | 1.20 | 4.20     | 1.00                   | 0.75 | 0.80     | 1.00                   | 0.83 | 0.92     | 1.00    | 0.93 | 1.97     |
| Biglycan OS=Mus musculus OX=10090 GN=Bgn PE=1 SV=1                                                               | PGS1_MOUSE               | 42 kDa           | 1.00                       | 0.29 | 0.57     | 1.00                   | 0.84 | 1.05     | 1.00                   | 0.56 | 0.44     | 1.00    | 0.56 | 0.69     |
| Brain acid soluble protein 1 OS=Mus musculus OX=10090 GN=Basp1 PE=1 SV=3                                         | BASP1_MOUSE              | 22 kDa           | -                          | 3.00 | 4.00     | 1.00                   | 0.90 | 1.00     | 1.00                   | 1.00 | 1.75     | 1.00    | 1.63 | 2.28     |
| Caldesmon 1 OS=Mus musculus OX=10090 GN=Cald1 PE=1 SV=1                                                          | E9Q0M9_MOUSE             | 62 kDa           | 1.00                       | 2.50 | 6.50     | 1.00                   | 0.44 | 1.11     | 1.00                   | 1.67 | 3.00     | 1.00    | 1.54 | 3.54     |
| Calreticulin OS=Mus musculus OX=10090 GN=Calr PE=1 SV=1                                                          | CALR_MOUSE               | 48 kDa           | 1.00                       | 3.25 | 4.00     | 1.00                   | 1.13 | 1.13     | 1.00                   | 1.20 | 0.93     | 1.00    | 1.86 | 2.02     |
| Calumenin OS=Mus musculus OX=10090 GN=Calu PE=1 SV=1                                                             | CALU_MOUSE               | 37 kDa           | -                          | 6.00 | 8.00     | 1.00                   | 0.56 | 0.56     | 1.00                   | 1.17 | 1.17     | 1.00    | 2.57 | 3.24     |
| Carboxypeptidase E OS=Mus musculus OX=10090 GN=Cpe PE=1 SV=2                                                     | CBPE_MOUSE               | 53 kDa           | 1.00                       | 0.60 | 1.70     | 1.00                   | 0.48 | 0.77     | 1.00                   | 0.58 | 0.84     | 1.00    | 0.55 | 1.11     |
| Cathepsin B OS=Mus musculus OX=10090 GN=Ctsb PE=1 SV=2                                                           | CATB_MOUSE               | 37 kDa           | 1.00                       | 1.13 | 2.00     | 1.00                   | 0.47 | 0.93     | 1.00                   | 0.65 | 0.59     | 1.00    | 0.75 | 1.17     |
| Cathepsin Z OS=Mus musculus OX=10090 GN=Ctsz PE=1 SV=1                                                           | CATZ_MOUSE               | 34 kDa           | 1.00                       | 1.50 | 2.00     | 1.00                   | 0.67 | 1.00     | 1.00                   | 1.00 | 1.50     | 1.00    | 1.06 | 1.50     |
| Cluster of Isoform 2 of Tropomyosin beta chain OS=Mus musculus OX=10090 GN=Tpm2 (sp)IP58774-2[TPM2_MOUSE]        | spIP58774-2[TPM2_MOUSE]  | 33 kDa           | 1.00                       | 1.86 | 3.00     | 1.00                   | 0.65 | 0.76     | 1.00                   | 0.62 | 0.71     | 1.00    | 1.04 | 1.49     |
| Cofilin-1 OS=Mus musculus OX=10090 GN=Cfl1 PE=1 SV=3                                                             | COF1_MOUSE               | 19 kDa           | 1.00                       | 7.00 | 15.00    | 1.00                   | 3.00 | 6.50     | 1.00                   | 0.75 | 1.00     | 1.00    | 3.58 | 7.50     |
| Collagen alpha-1(I) chain OS=Mus musculus OX=10090 GN=Col1a1 PE=1 SV=4                                           | spPI1087[CO1a1_MOUSE]    | 138 kDa          | 1.00                       | 0.67 | 1.00     | 1.00                   | 0.65 | 0.86     | 1.00                   | 0.61 | 0.58     | 1.00    | 0.64 | 0.81     |
| Collagen alpha-1(IV) chain OS=Mus musculus OX=10090 GN=Col4a1 PE=1 SV=4                                          | CO4A1_MOUSE              | 161 kDa          | 1.00                       | 0.80 | 1.60     | 1.00                   | 0.80 | 1.00     | 1.00                   | 1.25 | 1.00     | 1.00    | 0.95 | 1.20     |
| Collagen alpha-1(V) chain OS=Mus musculus OX=10090 GN=Col5a1 PE=1 SV=2                                           | CO5A1_MOUSE              | 184 kDa          | 1.00                       | 1.00 | 1.33     | 1.00                   | 0.33 | 0.67     | 1.00                   | 0.67 | 0.67     | 1.00    | 0.67 | 0.89     |
| Collagen alpha-2(I) chain OS=Mus musculus OX=10090 GN=Col1a2 PE=1 SV=2                                           | CO1A2_MOUSE              | 130 kDa          | 1.00                       | 0.39 | 0.72     | 1.00                   | 0.66 | 1.00     | 1.00                   | 1.00 | 1.00     | 1.00    | 0.68 | 0.91     |
| Collagen alpha-2(IV) chain OS=Mus musculus OX=10090 GN=Col4a2 PE=1 SV=4                                          | CO4A2_MOUSE              | 167 kDa          | 1.00                       | 0.18 | 0.91     | 1.00                   | 0.31 | 0.77     | 1.00                   | 1.25 | 1.00     | 1.00    | 0.58 | 0.89     |
| Collagen alpha-2(V) chain OS=Mus musculus OX=10090 GN=Col5a2 PE=1 SV=1                                           | CO5A2_MOUSE              | 145 kDa          | 1.00                       | 0.67 | 1.29     | 1.00                   | 0.62 | 1.09     | 1.00                   | 1.00 | 1.00     | 1.00    | 0.76 | 1.12     |
| Complement C3 OS=Mus musculus OX=10090 GN=C3 PE=1 SV=3                                                           | spJP01027[CO3_MOUSE]     | 186 kDa          | 1.00                       | 0.00 | 3.00     | 1.00                   | 0.45 | 0.70     | 1.00                   | 2.40 | 1.00     | 1.00    | 0.95 | 1.57     |
| Creatine kinase B-type OS=Mus musculus OX=10090 GN=Ckb PE=1 SV=1                                                 | KCRB_MOUSE               | 43 kDa           | 1.00                       | 2.75 | 7.50     | 1.00                   | 0.60 | 1.00     | 1.00                   | 1.00 | 1.04     | 1.00    | 1.45 | 3.18     |
| Cystatin-C OS=Mus musculus OX=10090 GN=Cst3 PE=1 SV=2                                                            | CYTC_MOUSE               | 16 kDa           | 1.00                       | 0.75 | 2.00     | 1.00                   | 0.85 | 0.92     | 1.00                   | 1.20 | 1.20     | 1.00    | 0.93 | 1.37     |
| EGF-containing fibulin-like extracellular matrix protein 1 OS=Mus musculus OX=10090 GN=Efemp1 PE=1 SV=1          | FBLN3_MOUSE              | 55 kDa           | 1.00                       | 0.00 | 0.67     | 1.00                   | 0.00 | 0.40     | 1.00                   | 0.25 | 0.75     | 1.00    | 0.08 | 0.61     |
| EGF-containing fibulin-like extracellular matrix protein 2 OS=Mus musculus OX=10090 GN=Efemp2 PE=1 SV=1          | FBLN4_MOUSE (+1)         | 49 kDa           | 1.00                       | 0.00 | 1.00     | 1.00                   | 0.54 | 0.69     | 1.00                   | 0.60 | 0.80     | 1.00    | 0.38 | 0.83     |
| Elongation factor 1-alpha 1 OS=Mus musculus OX=10090 GN=Eef1a1 PE=1 SV=3                                         | EF1A1_MOUSE              | 50 kDa           | 1.00                       | 1.00 | 2.40     | 1.00                   | 1.00 | 1.20     | 1.00                   | 0.83 | 0.75     | 1.00    | 0.94 | 1.45     |
| Endoplasmic reticulum chaperone BiP OS=Mus musculus OX=10090 GN=Hspa5 PE=1 SV=3                                  | BIP_MOUSE                | 72 kDa           | 1.00                       | 2.07 | 2.43     | 1.00                   | 2.05 | 1.48     | 1.00                   | 1.38 | 1.12     | 1.00    | 1.83 | 1.67     |
| Endoplasmic reticulum chaperone BiP OS=Mus musculus OX=10090 GN=Hsp90b1 PE=1 SV=2                                | ENPL_MOUSE               | 92 kDa           | 1.00                       | 5.75 | 5.00     | 1.00                   | 1.89 | 1.37     | 1.00                   | 1.68 | 1.11     | 1.00    | 3.11 | 2.49     |
| Extracellular matrix protein 1 OS=Mus musculus OX=10090 GN=Ecm1 PE=1 SV=2                                        | spJQ61508[Ecm1_MOUSE]    | 63 kDa           | 1.00                       | 0.40 | 1.20     | 1.00                   | 0.25 | 0.50     | 1.00                   | 0.50 | 0.67     | 1.00    | 0.38 | 0.79     |
| Ezrin OS=Mus musculus OX=10090 GN=Ezr PE=1 SV=3                                                                  | EZRI_MOUSE               | 69 kDa           | 1.00                       | 1.20 | 2.40     | 1.00                   | 0.43 | 0.79     | 1.00                   | 0.86 | 1.00     | 1.00    | 0.83 | 1.40     |
| Farnesyl pyrophosphate synthase OS=Mus musculus OX=10090 GN=Fdps PE=1 SV=1                                       | FPPS_MOUSE               | 41 kDa           | 1.00                       | 4.00 | 8.00     | 1.00                   | 0.43 | 1.29     | 1.00                   | 0.71 | 0.71     | 1.00    | 1.71 | 3.33     |
| Fibromodulin OS=Mus musculus OX=10090 GN=Fmod PE=2 SV=1                                                          | FMOD_MOUSE               | 43 kDa           | 1.00                       | 1.00 | 2.67     | 1.00                   | 0.31 | 0.92     | 1.00                   | 0.33 | 0.56     | 1.00    | 0.55 | 1.38     |
| Fibronectin OS=Mus musculus OX=10090 GN=Fbn1 PE=1 SV=1                                                           | AOA087WR50_MOUSE         | 263 kDa          | 1.00                       | 0.45 | 1.03     | 1.00                   | 0.70 | 0.89     | 1.00                   | 0.85 | 0.77     | 1.00    | 0.67 | 0.89     |
| Fibulin-5 OS=Mus musculus OX=10090 GN=Fbln5 PE=1 SV=1                                                            | AOA1Y7VJW9_MOUSE (+1)    | 52 kDa           | 1.00                       | 0.33 | 1.33     | 1.00                   | 0.53 | 0.63     | 1.00                   | 0.22 | 0.22     | 1.00    | 0.36 | 0.73     |
| Filamin-B OS=Mus musculus OX=10090 GN=Flnb PE=1 SV=3                                                             | FLNB_MOUSE               | 278 kDa          | 1.00                       | 0.40 | 4.20     | 1.00                   | 0.71 | 1.05     | 1.00                   | 0.94 | 0.89     | 1.00    | 0.69 | 2.05     |
| Filamin, alpha OS=Mus musculus OX=10090 GN=Flna PE=1 SV=1                                                        | B7FAU9_MOUSE (+2)        | 280 kDa          | 1.00                       | 0.88 | 3.53     | 1.00                   | 0.69 | 1.24     | 1.00                   | 1.14 | 1.08     | 1.00    | 0.90 | 1.95     |
| Follistatin-related protein 1 OS=Mus musculus OX=10090 GN=Fstl1 PE=1 SV=2                                        | FSTL1_MOUSE              | 35 kDa           | 1.00                       | 1.75 | 1.75     | 1.00                   | 0.90 | 1.05     | 1.00                   | 0.50 | 0.67     | 1.00    | 1.05 | 1.15     |
| Fructose-bisphosphate aldolase A OS=Mus musculus OX=10090 GN=Aldoa PE=1 SV=2                                     | ALDOA_MOUSE              | 39 kDa           | 1.00                       | 2.50 | 6.75     | 1.00                   | 0.68 | 1.05     | 1.00                   | 0.75 | 0.96     | 1.00    | 1.31 | 2.92     |
| Galectin-1 OS=Mus musculus OX=10090 GN=Lgals1 PE=1 SV=3                                                          | LEG1_MOUSE               | 15 kDa           | 1.00                       | 1.50 | 3.50     | 1.00                   | 1.00 | 1.67     | 1.00                   | 1.67 | 1.33     | 1.00    | 1.39 | 2.17     |
| Galectin-3-binding protein OS=Mus musculus OX=10090 GN=Lgals3bp PE=1 SV=1                                        | LG3BP_MOUSE              | 64 kDa           | 1.00                       | 0.29 | 0.71     | 1.00                   | 0.50 | 0.50     | 1.00                   | 0.50 | 1.00     | 1.00    | 0.43 | 0.74     |
| Glucose-6-phosphate isomerase OS=Mus musculus OX=10090 GN=Gpi PE=1 SV=4                                          | G6PI_MOUSE               | 63 kDa           | 1.00                       | 9.00 | 17.00    | 1.00                   | 0.60 | 1.27     | 1.00                   | 1.31 | 1.23     | 1.00    | 3.64 | 6.50     |
| Glutathione S-transferase Mu 1 OS=Mus musculus OX=10090 GN=Gstm1 PE=1 SV=2                                       | GSTM1_MOUSE              | 26 kDa           | 1.00                       | 0.60 | 3.60     | 1.00                   | 0.83 | 1.17     | 1.00                   | 1.00 | 1.09     | 1.00    | 0.81 | 1.95     |
| Glutathione S-transferase Mu 2 OS=Mus musculus OX=10090 GN=Gstm2 PE=1 SV=2                                       | GSTM2_MOUSE              | 26 kDa           | 1.00                       | 0.33 | 4.67     | 1.00                   | 1.00 | 1.60     | 1.00                   | 1.33 | 1.67     | 1.00    | 0.89 | 2.64     |
| Glypican-4 OS=Mus musculus OX=10090 GN=Gpc4 PE=1 SV=2                                                            | GPC4_MOUSE               | 63 kDa           | 1.00                       | 0.78 | 1.67     | 1.00                   | 0.69 | 0.96     | 1.00                   | 0.50 | 0.70     | 1.00    | 0.66 | 1.11     |
| Growth arrest-specific protein 6 OS=Mus musculus OX=10090 GN=Gas6 PE=2 SV=2                                      | GAS6_MOUSE               | 75 kDa           | 1.00                       | 0.00 | 0.60     | 1.00                   | 0.09 | 0.18     | 1.00                   | 0.00 | 0.00     | 1.00    | 0.03 | 0.26     |
| Heat shock cognate 71 kDa protein OS=Mus musculus OX=10090 GN=Hspa8 PE=1 SV=1                                    | HSP7C_MOUSE              | 71 kDa           | 1.00                       | 0.93 | 2.36     | 1.00                   | 0.88 | 1.21     | 1.00                   | 0.88 | 0.97     | 1.00    | 0.90 | 1.51     |
| Heat shock protein HSP 90-alpha OS=Mus musculus OX=10090 GN=Hsp90aa1 PE=1 SV=4                                   | HS90A_MOUSE              | 85 kDa           | 1.00                       | 1.00 | 2.63     | 1.00                   | 0.45 | 0.90     | 1.00                   | 1.09 | 1.04     | 1.00    | 0.85 | 1.52     |
| Heat shock protein HSP 90-beta OS=Mus musculus OX=10090 GN=Hsp90ab1 PE=1 SV=3                                    | HS90B_MOUSE              | 83 kDa           | 1.00                       | 1.40 | 2.50     | 1.00                   | 0.47 | 0.94     | 1.00                   | 1.00 | 1.00     | 1.00    | 0.96 | 1.48     |
| Insulin-like growth factor-binding protein 2 OS=Mus musculus OX=10090 GN=Igfbp2 PE=2 SV=2                        | IBP2_MOUSE               | 33 kDa           | 1.00                       | 1.18 | 1.88     | 1.00                   | 0.62 | 0.87     | 1.00                   | 0.56 | 0.70     | 1.00    | 0.78 | 1.15     |
| Insulin-like growth factor-binding protein 3 OS=Mus musculus OX=10090 GN=Igfbp3 PE=2 SV=2                        | IBP3_MOUSE               | 32 kDa           | 1.00                       | 0.50 | 1.00     | 1.00                   | 0.57 | 1.29     | 1.00                   | 0.80 | 0.80     | 1.00    | 0.62 | 1.03     |
| Insulin-like growth factor-binding protein 5 OS=Mus musculus OX=10090 GN=Igfbp5 PE=1 SV=1                        | IBP5_MOUSE               | 30 kDa           | 1.00                       | 0.50 | 2.00     | 1.00                   | 0.44 | 1.22     | 1.00                   | 1.00 | 1.50     | 1.00    | 0.65 | 1.57     |
| Isoform 2 of A-kinase anchor protein 12 OS=Mus musculus OX=10090 GN=Akap12                                       | spIQ9WT05-2[AKA12_MOUSE] | 170 kDa          | 1.00                       | 2.20 | 4.20     | 1.00                   | 0.63 | 1.16     | 1.00                   | 1.00 | 1.04     | 1.00    | 1.28 | 2.13     |
| Isoform 2 of Calsynin-1 OS=Mus musculus OX=10090 GN=Cstn1                                                        | spIQ9EPL2-2[CSTN1_MOUSE] | 108 kDa          | 1.00                       | 0.20 | 0.60     | 1.00                   | 0.75 | 0.75     | 1.00                   | 0.63 | 0.75     | 1.00    | 0.53 | 0.70     |
| Isoform 2                                                                                                        |                          |                  |                            |      |          |                        |      |          |                        |      |          |         |      |          |

Table S1 (related to Figure 3). Proteins identified in conditioned media from vehicle-, Tg- and Tg+GSK2606414-treated astrocytes.

| Identified Proteins                                                                                                             | Accession Number             | Molecular Weight | Normalised spectral counts |      |          |                        |      |          |                        |      |          |         |      |          |
|---------------------------------------------------------------------------------------------------------------------------------|------------------------------|------------------|----------------------------|------|----------|------------------------|------|----------|------------------------|------|----------|---------|------|----------|
|                                                                                                                                 |                              |                  | Biological replicate 1     |      |          | Biological replicate 2 |      |          | Biological replicate 3 |      |          | Average |      |          |
|                                                                                                                                 |                              |                  | vehicle                    | Tg   | Tg + GSK | vehicle                | Tg   | Tg + GSK | vehicle                | Tg   | Tg + GSK | vehicle | Tg   | Tg + GSK |
| Isoform 2 of Glial fibrillary acidic protein OS=Mus musculus OX=10090 GN=Gfap                                                   | sp P03995-2 GFAP_MOUSE       | 48 kDa           | 1.00                       | 2.00 | 8.50     | 1.00                   | 1.33 | 1.17     | 1.00                   | 0.67 | 0.67     | 1.00    | 1.33 | 3.44     |
| Isoform 2 of Glucosidase 2 subunit beta OS=Mus musculus OX=10090 GN=Pkrksh                                                      | sp O08795-2 GLU2B_MOUSE (+1) | 60 kDa           | 1.00                       | 5.00 | 3.00     | 1.00                   | 2.00 | 1.50     | 1.00                   | 1.80 | 1.60     | 1.00    | 2.93 | 2.03     |
| Isoform 2 of Prolyl 4-hydroxylase subunit alpha-1 OS=Mus musculus OX=10090 GN=P4ha1                                             | sp Q60715-2 P4HA1_MOUSE      | 61 kDa           | -                          | 9.00 | 10.00    | 1.00                   | 4.67 | 3.33     | 1.00                   | 4.33 | 3.33     | 1.00    | 6.00 | 5.56     |
| Isoform 2 of Tropomyosin alpha-1 chain OS=Mus musculus OX=10090 GN=Tpm1                                                         | sp P58771-2 TPM1_MOUSE       | 33 kDa           | 1.00                       | 1.40 | 3.00     | 1.00                   | 0.70 | 0.87     | 1.00                   | 0.78 | 0.73     | 1.00    | 0.96 | 1.53     |
| Isoform 2 of Tropomyosin alpha-3 chain OS=Mus musculus OX=10090 GN=Tpm3                                                         | sp P21107-2 TPM3_MOUSE       | 29 kDa           | 1.00                       | 1.78 | 3.44     | 1.00                   | 0.72 | 0.89     | 1.00                   | 0.86 | 0.90     | 1.00    | 1.12 | 1.75     |
| Isoform M1 of Pyruvate kinase PKM OS=Mus musculus OX=10090 GN=Pkm                                                               | sp P52480-2 PKPYM_MOUSE      | 58 kDa           | 1.00                       | 0.70 | 2.90     | 1.00                   | 0.87 | 1.27     | 1.00                   | 1.28 | 1.28     | 1.00    | 0.95 | 1.81     |
| Isoform Short of 14-3-3 protein beta/alpha OS=Mus musculus OX=10090 GN=Ywhab                                                    | sp Q9CQV8-2 1433B_MOUSE (+1) | 28 kDa           | 1.00                       | 2.25 | 6.00     | 1.00                   | 0.75 | 1.50     | 1.00                   | 0.69 | 0.56     | 1.00    | 1.23 | 2.69     |
| L-lactate dehydrogenase OS=Mus musculus OX=10090 GN=LdhA PE=1 SV=1                                                              | A0A1B0GSX0_MOUSE (+2)        | 40 kDa           | 1.00                       | 1.25 | 2.25     | 1.00                   | 0.47 | 0.93     | 1.00                   | 0.82 | 0.76     | 1.00    | 0.85 | 1.32     |
| Latent-transforming growth factor beta-binding protein 2 OS=Mus musculus OX=10090 GN=Ltbp2 PE=1 SV=1                            | E9QNQ3_MOUSE                 | 196 kDa          | 1.00                       | 0.40 | 0.80     | 1.00                   | 0.57 | 0.86     | 1.00                   | 0.67 | 0.33     | 1.00    | 0.55 | 0.66     |
| LIM and SH3 domain protein 1 OS=Mus musculus OX=10090 GN=Lasp1 PE=1 SV=1                                                        | LASP1_MOUSE                  | 30 kDa           | -                          | 3.00 | 4.00     | 1.00                   | 0.33 | 1.33     | 1.00                   | 1.00 | 1.67     | 1.00    | 1.44 | 2.33     |
| Low density lipoprotein receptor-related protein 1 OS=Mus musculus OX=10090 GN=Lrp1 PE=1 SV=1                                   | A0A0R4J0I9_MOUSE (+1)        | 505 kDa          | 1.00                       | 0.18 | 0.76     | 1.00                   | 0.58 | 1.12     | 1.00                   | 0.74 | 0.74     | 1.00    | 0.50 | 0.87     |
| Low-density lipoprotein receptor-related protein 2 OS=Mus musculus OX=10090 GN=Lrp2 PE=1 SV=1                                   | LRP2_MOUSE                   | 519 kDa          | 1.00                       | 0.00 | 0.75     | 1.00                   | 0.82 | 1.47     | 1.00                   | 1.08 | 0.83     | 1.00    | 0.64 | 1.02     |
| Macrophage colony-stimulating factor 1 OS=Mus musculus OX=10090 GN=Csf1 PE=1 SV=2                                               | sp P07141 CSF1_MOUSE         | 61 kDa           | 1.00                       | 1.00 | 1.00     | 1.00                   | 0.83 | 1.00     | 1.00                   | 0.67 | 1.00     | 1.00    | 0.83 | 1.00     |
| Malate dehydrogenase, cytoplasmic OS=Mus musculus OX=10090 GN=Mdh1 PE=1 SV=3                                                    | MDHC_MOUSE                   | 37 kDa           | 1.00                       | 3.00 | 12.00    | 1.00                   | 0.50 | 1.10     | 1.00                   | 1.14 | 1.14     | 1.00    | 1.55 | 4.75     |
| Malate dehydrogenase, mitochondrial OS=Mus musculus OX=10090 GN=Mdh2 PE=1 SV=3                                                  | MDHM_MOUSE                   | 36 kDa           | 1.00                       | 2.50 | 6.50     | 1.00                   | 0.67 | 0.83     | 1.00                   | 1.11 | 0.89     | 1.00    | 1.43 | 2.74     |
| Metalloproteinase inhibitor 2 OS=Mus musculus OX=10090 GN=Tim2 PE=1 SV=1                                                        | Q6P1I7_MOUSE (+1)            | 24 kDa           | 1.00                       | 0.67 | 1.33     | 1.00                   | 0.56 | 0.67     | 1.00                   | 0.33 | 0.42     | 1.00    | 0.52 | 0.81     |
| Moesin OS=Mus musculus OX=10090 GN=Msn PE=1 SV=3                                                                                | MOES_MOUSE                   | 68 kDa           | 1.00                       | 1.33 | 4.00     | 1.00                   | 0.44 | 1.00     | 1.00                   | 0.87 | 1.00     | 1.00    | 0.88 | 2.00     |
| Myosin-9 OS=Mus musculus OX=10090 GN=Myh9 PE=1 SV=4                                                                             | MYH9_MOUSE                   | 226 kDa          | 1.00                       | 5.00 | 38.00    | 1.00                   | 0.83 | 1.24     | 1.00                   | 1.24 | 1.12     | 1.00    | 2.36 | 13.45    |
| N(G),N(G)-dimethylarginine dimethylaminohydrolase 1 OS=Mus musculus OX=10090 GN=Ndah1 PE=1 SV=3                                 | DDAH1_MOUSE                  | 31 kDa           | -                          | 1.00 | 1.75     | 1.00                   | 1.00 | 1.00     | 1.00                   | 1.20 | 0.80     | 1.00    | 2.07 | 2.93     |
| Nestin OS=Mus musculus OX=10090 GN=Nes PE=1 SV=1                                                                                | sp Q6P5H2 NEST_MOUSE         | 207 kDa          | 1.00                       | 1.00 | 3.40     | 1.00                   | 0.17 | 0.61     | 1.00                   | 1.11 | 1.04     | 1.00    | 0.76 | 1.68     |
| Neurocan core protein OS=Mus musculus OX=10090 GN=Ncan PE=1 SV=1                                                                | A0A0R4IZX5_MOUSE (+1)        | 137 kDa          | 1.00                       | 0.60 | 1.60     | 1.00                   | 1.00 | 1.00     | 1.00                   | 0.50 | 1.00     | 1.00    | 0.70 | 1.20     |
| Nidogen-2 OS=Mus musculus OX=10090 GN=Nid2 PE=1 SV=2                                                                            | NID2_MOUSE                   | 154 kDa          | 1.00                       | 0.20 | 1.20     | 1.00                   | 0.47 | 0.53     | 1.00                   | 0.63 | 0.63     | 1.00    | 0.43 | 0.78     |
| Nucleobindin-1 OS=Mus musculus OX=10090 GN=Nucb1 PE=1 SV=2                                                                      | NUCB1_MOUSE                  | 53 kDa           | 1.00                       | 3.25 | 2.75     | 1.00                   | 0.75 | 0.94     | 1.00                   | 0.58 | 0.75     | 1.00    | 1.53 | 1.48     |
| Nucleoside diphosphate kinase OS=Mus musculus OX=10090 GN=Gm20390 PE=3 SV=1                                                     | E9PZF0_MOUSE                 | 30 kDa           | 1.00                       | 1.33 | 3.67     | 1.00                   | 0.86 | 1.14     | 1.00                   | 1.40 | 1.00     | 1.00    | 1.20 | 1.94     |
| Peptidyl-prolyl cis-trans isomerase A OS=Mus musculus OX=10090 GN=Ppia PE=1 SV=2                                                | PPIA_MOUSE                   | 18 kDa           | 1.00                       | 1.50 | 4.00     | 1.00                   | 0.78 | 1.44     | 1.00                   | 1.83 | 1.83     | 1.00    | 1.37 | 2.43     |
| Peroxiredoxin-1 OS=Mus musculus OX=10090 GN=Prdx1 PE=1 SV=1                                                                     | PRDX1_MOUSE                  | 22 kDa           | 1.00                       | 1.00 | 2.50     | 1.00                   | 1.00 | 1.56     | 1.00                   | 1.14 | 1.00     | 1.00    | 1.05 | 1.69     |
| Peroxiredoxin-2 OS=Mus musculus OX=10090 GN=Prdx2 PE=1 SV=3                                                                     | PRDX2_MOUSE                  | 22 kDa           | 1.00                       | 1.00 | 2.33     | 1.00                   | 1.00 | 1.60     | 1.00                   | 1.25 | 1.00     | 1.00    | 1.08 | 1.64     |
| Phosphoglycerate kinase 1 OS=Mus musculus OX=10090 GN=Pgk1 PE=1 SV=4                                                            | -                            | 45 kDa           | -                          | 5.00 | 14.00    | 1.00                   | 1.40 | 2.60     | 1.00                   | 1.33 | 1.33     | 1.00    | 2.58 | 5.98     |
| Pigment epithelium-derived factor OS=Mus musculus OX=10090 GN=Serpinf1 PE=1 SV=2                                                | PDF_MOUSE                    | 46 kDa           | 1.00                       | 0.86 | 1.57     | 1.00                   | 0.47 | 0.80     | 1.00                   | 0.42 | 0.58     | 1.00    | 0.58 | 0.98     |
| Plasminogen activator inhibitor 1 OS=Mus musculus OX=10090 GN=Serpine1 PE=1 SV=1                                                | GSE899_MOUSE                 | 45 kDa           | 1.00                       | 0.25 | 2.75     | 1.00                   | 0.44 | 0.89     | 1.00                   | 0.64 | 0.71     | 1.00    | 0.45 | 1.45     |
| Prosaposin OS=Mus musculus OX=10090 GN=Psap PE=1 SV=1                                                                           | E9PZ00_MOUSE (+4)            | 61 kDa           | 1.00                       | 0.71 | 2.86     | 1.00                   | 0.53 | 1.13     | 1.00                   | 0.58 | 0.83     | 1.00    | 0.61 | 1.61     |
| Proteasome subunit alpha type-1 OS=Mus musculus OX=10090 GN=Pasma1 PE=1 SV=1                                                    | PSA1_MOUSE                   | 30 kDa           | 1.00                       | 3.00 | 10.00    | 1.00                   | 0.67 | 0.83     | 1.00                   | 0.86 | 0.71     | 1.00    | 1.51 | 3.85     |
| Proteasome subunit alpha type-6 OS=Mus musculus OX=10090 GN=Pasma6 PE=1 SV=1                                                    | PSA6_MOUSE                   | 27 kDa           | 1.00                       | 3.00 | 6.00     | 1.00                   | 0.67 | 1.00     | 1.00                   | 1.50 | 1.25     | 1.00    | 1.72 | 2.75     |
| Proteasome subunit alpha type-7 OS=Mus musculus OX=10090 GN=Pasma7 PE=1 SV=1                                                    | PSA7_MOUSE                   | 28 kDa           | 1.00                       | 1.50 | 4.00     | 1.00                   | 1.00 | 0.83     | 1.00                   | 0.78 | 0.89     | 1.00    | 1.09 | 1.91     |
| Protein disulfide-isomerase A3 OS=Mus musculus OX=10090 GN=Pdia3 PE=1 SV=2                                                      | PDI3_MOUSE                   | 57 kDa           | 1.00                       | 3.33 | 5.17     | 1.00                   | 1.32 | 1.18     | 1.00                   | 1.30 | 0.96     | 1.00    | 1.99 | 2.44     |
| Protein disulfide-isomerase A4 OS=Mus musculus OX=10090 GN=Pdia4 PE=1 SV=1                                                      | A0A0R4J0Z1_MOUSE (+1)        | 72 kDa           | 1.00                       | 7.00 | 14.00    | 1.00                   | 1.40 | 1.60     | 1.00                   | 2.13 | 1.13     | 1.00    | 3.51 | 5.58     |
| Protein disulfide-isomerase A6 OS=Mus musculus OX=10090 GN=Pdia6 PE=1 SV=1                                                      | Q3TML0_MOUSE                 | 49 kDa           | 1.00                       | 7.00 | 9.00     | 1.00                   | 1.67 | 1.67     | 1.00                   | 1.80 | 1.60     | 1.00    | 3.49 | 4.09     |
| Protein disulfide-isomerase OS=Mus musculus OX=10090 GN=P4hb PE=1 SV=2                                                          | PDI1_MOUSE                   | 57 kDa           | 1.00                       | 1.40 | 1.40     | 1.00                   | 1.42 | 1.47     | 1.00                   | 1.00 | 0.81     | 1.00    | 1.27 | 1.23     |
| Purine nucleoside phosphorylase OS=Mus musculus OX=10090 GN=Pnp PE=1 SV=2                                                       | PNPH_MOUSE (+1)              | 32 kDa           | -                          | 5.00 | 14.00    | 1.00                   | 0.00 | 0.88     | 1.00                   | 1.29 | 1.29     | 1.00    | 2.10 | 5.39     |
| Rab GDP dissociation inhibitor alpha OS=Mus musculus OX=10090 GN=Gdi1 PE=1 SV=3                                                 | GDIA_MOUSE                   | 51 kDa           | 1.00                       | 3.00 | 10.00    | 1.00                   | 0.56 | 1.67     | 1.00                   | 1.14 | 1.43     | 1.00    | 1.57 | 4.37     |
| Rab GDP dissociation inhibitor beta OS=Mus musculus OX=10090 GN=Gdi2 PE=1 SV=1                                                  | sp Q61598 GDIB_MOUSE         | 51 kDa           | 1.00                       | 2.50 | 10.00    | 1.00                   | 0.67 | 1.20     | 1.00                   | 1.50 | 1.58     | 1.00    | 1.56 | 4.26     |
| Radixin OS=Mus musculus OX=10090 GN=Rdx PE=1 SV=3                                                                               | RADI_MOUSE                   | 69 kDa           | 1.00                       | 1.25 | 3.25     | 1.00                   | 0.44 | 1.11     | 1.00                   | 1.09 | 1.09     | 1.00    | 0.93 | 1.82     |
| Receptor-type tyrosine-protein phosphatase zeta OS=Mus musculus OX=10090 GN=Ptprz1 PE=1 SV=1                                    | PRPTZ_MOUSE                  | 254 kDa          | 1.00                       | 0.57 | 1.00     | 1.00                   | 0.83 | 1.06     | 1.00                   | 0.71 | 0.57     | 1.00    | 0.71 | 0.88     |
| Serine/threonine-protein phosphatase 2A 65 kDa regulatory subunit A alpha isoform OS=Mus musculus OX=10090 GN=Ppp2r1a PE=1 SV=3 | 2AAA_MOUSE                   | 65 kDa           | -                          | 3.00 | 4.00     | 1.00                   | 0.67 | 2.00     | 1.00                   | 1.00 | 1.40     | 1.00    | 1.56 | 2.47     |
| SPARC OS=Mus musculus OX=10090 GN=Sparc PE=1 SV=1                                                                               | A0A1L1SSH9_MOUSE (+2)        | 38 kDa           | 1.00                       | 1.05 | 1.52     | 1.00                   | 0.71 | 0.71     | 1.00                   | 0.57 | 0.48     | 1.00    | 0.77 | 0.90     |
| SPARC-like protein 1 OS=Mus musculus OX=10090 GN=Sparc1 PE=1 SV=3                                                               | SPRL1_MOUSE                  | 72 kDa           | 1.00                       | 0.00 | 0.33     | 1.00                   | 0.00 | 0.18     | 1.00                   | 1.00 | 0.67     | 1.00    | 0.33 | 0.39     |
| Tenascin OS=Mus musculus OX=10090 GN=Tnc PE=1 SV=1                                                                              | sp Q80YX1 TEN_A_MOUSE        | 232 kDa          | 1.00                       | 0.54 | 1.46     | 1.00                   | 1.04 | 0.92     | 1.00                   | 0.84 | 0.80     | 1.00    | 0.81 | 1.06     |
| Thioredoxin domain-containing protein 5 OS=Mus musculus OX=10090 GN=Tnxd5 PE=1 SV=1                                             | E9PXX7_MOUSE (+1)            | 39 kDa           | 1.00                       | 7.00 | 13.00    | 1.00                   | 1.86 | 1.86     | 1.00                   | 1.33 | 1.00     | 1.00    | 3.40 | 5.29     |
| Transgelin OS=Mus musculus OX=10090 GN=Tagln PE=1 SV=3                                                                          | TAGL_MOUSE                   | 23 kDa           | 1.00                       | 2.00 | 4.00     | 1.00                   | 0.46 | 1.00     | 1.00                   | 0.87 | 0.73     | 1.00    | 1.11 | 1.91     |
| Transitional endoplasmic reticulum ATPase OS=Mus musculus OX=10090 GN=Vcp PE=1 SV=4                                             | TERA_MOUSE                   | 89 kDa           | 1.00                       | 1.13 | 3.25     | 1.00                   | 1.00 | 1.63     | 1.00                   | 1.09 | 1.18     | 1.00    | 1.07 | 2.02     |
| Transketolase OS=Mus musculus OX=10090 GN=Tkt PE=1 SV=1                                                                         | TKT_MOUSE                    | 68 kDa           | 1.00                       | 2.33 | 7.67     | 1.00                   | 0.88 | 1.25     | 1.00                   | 1.06 | 1.00     | 1.00    | 1.42 | 3.31     |
| Triosephosphate isomerase OS=Mus musculus OX=10090 GN=Tpi1 PE=1 SV=4                                                            | TPIS_MOUSE                   | 32 kDa           | -                          | 4.00 | 13.00    | 1.00                   | 1.00 | 1.75     | 1.00                   | 1.75 | 1.25     | 1.00    | 2.25 | 5.33     |
| Tropomyosin alpha-4 chain OS=Mus musculus OX=10090 GN=Tpm4 PE=1 SV=3                                                            | TPM4_MOUSE                   | 28 kDa           | 1.00                       | 2.60 | 4.60     | 1.00                   | 0.83 | 0.92     | 1.00                   | 0.60 | 0.87     | 1.00    | 1.34 | 2.13     |
| Tubulin beta-2A chain OS=Mus musculus OX=10090 GN=Tubb2a PE=1 SV=1                                                              | TBB2A_MOUSE                  | 50 kDa           | 1.00                       | 1.20 | 2.60     | 1.00                   | 0.59 | 0.88     | 1.00                   | 1.24 | 1.18     | 1.00    | 1.01 | 1.55     |
| Tubulin beta-4B chain OS=Mus musculus OX=10090 GN=Tubb4b PE=1 SV=1                                                              | TBB4B_MOUSE                  | 50 kDa           | 1.00                       | 1.00 | 2.50     | 1.00                   | 0.60 | 0.80     | 1.00                   | 1.46 | 1.46     | 1.00    | 1.02 | 1.59     |
| Tubulin beta-5 chain OS=Mus musculus OX=10090 GN=Tubb5 PE=1 SV=1                                                                | TBB5_MOUSE                   | 50 kDa           | 1.00                       | 1.00 | 2.83     | 1.00                   | 0.69 | 1.00     | 1.00                   | 1.12 | 1.12     | 1.00    | 0.94 | 1.65     |
| Vascular cell adhesion protein 1 OS=Mus musculus OX=10090 GN=Vcam1 PE=1 SV=1                                                    | Q3UPN1_MOUSE (+1)            | 81 kDa           | 1.00                       | 0.67 | 0.67     | 1.00                   | 1.00 | 1.50     | 1.00                   | 1.33 | 1.33     | 1.00    | 1.00 | 1.17     |
| Vinculin OS=Mus musculus OX=10090 GN=Vcl PE=1 SV=4                                                                              | VINC_MOUSE                   | 117 kDa          | 1.00                       | 0.50 | 8.50     | 1.00                   | 1.00 | 1.68     | 1.00                   | 1.28 | 1.24     | 1.00    | 0.93 | 3.81     |
| Vitamin K-dependent protein S OS=Mus musculus OX=10090 GN=Pros1 PE=2 SV=1                                                       | PROS_MOUSE                   | 75 kDa           | 1.00                       | 0.00 | 0.75     | 1.00                   | 0.38 | 0.50     | 1.00                   | 0.29 | 0.43     | 1.00    | 0.22 | 0.56     |
| WD repeat-containing protein 1 OS=Mus musculus OX=10090 GN=Wdr1 PE=1 SV=3                                                       | WDR1_MOUSE                   | 66 kDa           | 1.00                       | 0.75 | 3.00     | 1.00                   | 0.59 | 1.12     | 1.00                   | 1.13 | 1.27     | 1.00    | 0.82 | 1.79     |



**Table S1 (related to Figure 3). Proteins identified in conditioned media from vehicle-, Tg- and Tg+GSK2606414-treated astrocytes.** Astrocyte conditioned media was concentrated and analysed by LC/MS. A protein was identified if it received  $\geq 99\%$  confidence with  $\geq 3$  unique peptides at 95% confidence in the vehicle- or Tg-treated condition. Only proteins meeting this criterion across all 3 biological replicates were included. Spectral counts were normalised to the vehicle-treated condition; normalised spectral counts from 3 biological replicates are shown.

**Table S2 (related to STAR Methods). qPCR primer sequences used in this study.**

| Primer name         | Sequence               |
|---------------------|------------------------|
| Cxcl10 F            | ATGACGGGCCAGTGAGAATG   |
| Cxcl10 R            | TCGTGGCAATGATCTCAACAC  |
| Lcn2 F              | CCACCACGGACTACAACCAG   |
| Lcn2 R              | TCCTTGTTCTTCCATACAGGG  |
| Serpina3n F         | CCTGGAGGATGTCCTTTCAA   |
| Serpina3n R         | TTATCAGGAAAGGCCGATTG   |
| Vim F               | GCAGTATGAAAGCGTGGCT    |
| Vim R               | CTCCAGGGACTCGTTAGTGC   |
| C3 F                | AGCTTCAGGGTCCCAGCTAC   |
| C3 R                | GCTGGAATCTTGATGGAGACGC |
| $\Delta$ huGADD34 F | GGACCCTGAGACTCCCCTAAA  |
| $\Delta$ huAGDD34 R | AGGAAATGGACAGTGACCTTCT |
